# Supplementary material
Source: publisher figshare collection journal article supplement (https://diabetesjournals.figshare.com/ndownloader/files/28868367)
Supplement: Supplementary file 1 [file 28868367]

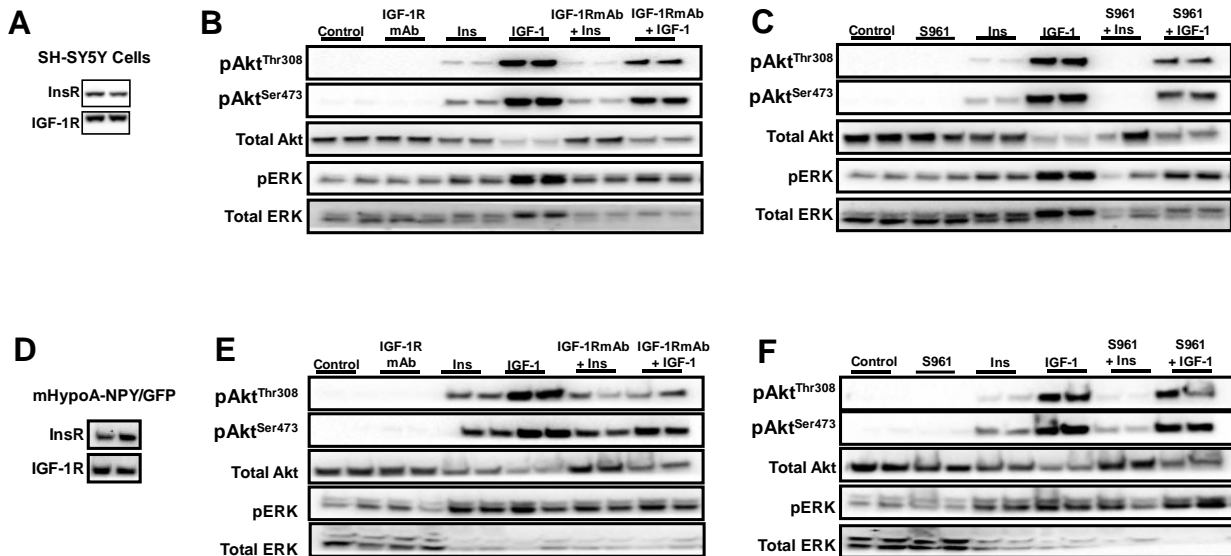

**Supplementary Figure 1.** Pharmacological inhibition of IGF-1R and InsR *in vitro* **A:** The SH-SY5Y cell line expresses both InsR and IGF-1R. **B:** Phosphorylation of downstream targets pAkt(Thr308), pAkt(Ser473) and pERK, were increased in SH-SY5Y cells after treatment with equimolar concentrations of Insulin or IGF-1, although IGF-1 seemed to be more potent in these cells. Pre-emptively treating SH-SY5Y cell with an IGF-1R antagonist mAb 30 min prior to ligand exposure, specifically reduced pAkt and pERK via IGF-1 treatment. **C:** Similarly, pre-emptively treating cells with S961 for 30min reduced expression of phosphorylated downstream targets via insulin. Treatment with this inhibitor also modestly reduced pAkt and pERK activation via IGF-1, perhaps due to interfering with collateral activation of the InsR by IGF-1. **D:** The mHypoA-NPY/GFP cell line expresses both InsR and IGF-1R. **E:** Phosphorylation of Akt and ERK was increased in mHypoA-NPY/GFP cells after treatment with equimolar concentrations of Insulin or IGF-1. Pre-emptively treating the cells with IGF-1RmAb for 30min, reduced the expression of pAkt and pERK in response to IGF-1. **F:** Pre-emptive treatment of cells with an InsR small molecule inhibitor, S961 for 30min, reduced expression of phosphorylated downstream targets in response to insulin. All *in vitro* experiments were run as biological duplicates.

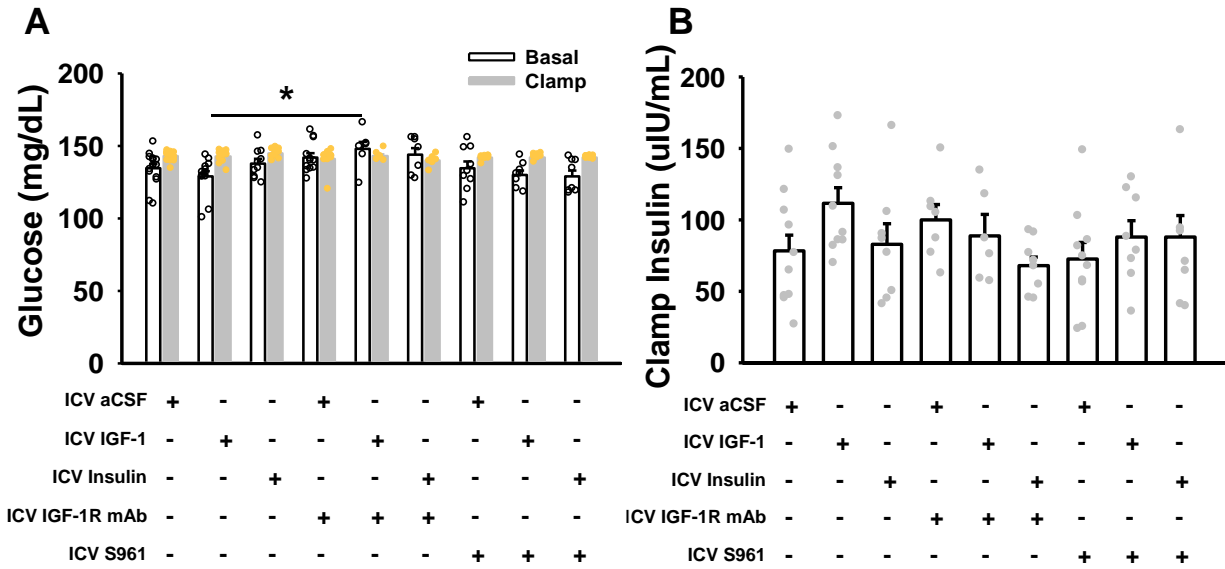

**Supplementary Figure 2.** Plasma glucose and insulin levels in FBN rats during the *in vivo* clamp study. **A:** Average plasma glucose levels under basal (white bar) and clamp conditions (gray bar) in rats. Under basal conditions, ICV IGF-1R mAb tended to raise basal glucose which was significant between ICV IGF-1 and ICV IGF-1+ICV mAb groups (aCSF Controls  $n=15$ , ICV IGF-1  $n=12$ , ICV Insulin  $n=10$ , ICV IGF-1R mAb only  $n=12$ , ICV IGF-1+IGF-1R mAb  $n=6$ , ICV Insulin+IGF-1R mAb  $n=7$ , ICV S961 only  $n=10$ , ICV S961+IGF1  $n=8$ , ICV S961+Insulin  $n=8$ ).  $*P<0.05$ ,  $\dagger P<0.01$ ,  $\ddagger P<0.001$  versus aCSF Control after Dunnett posthoc adjustment.. However, there were no significant differences in clamp glucose levels (targeting ~140-145mg/dL) among groups. **B:** Although some inherent variation was observed for clamp insulin levels among individual animals within groups, there were no significant differences among groups. Measurements were made in a pooled sample that included the 330, 340, 350 and 360 min sample draws. Bar graphs indicate means  $\pm$  standard error (SE) and circles indicate individual data points.  $*P<0.05$  after Tukey posthoc adjustment.

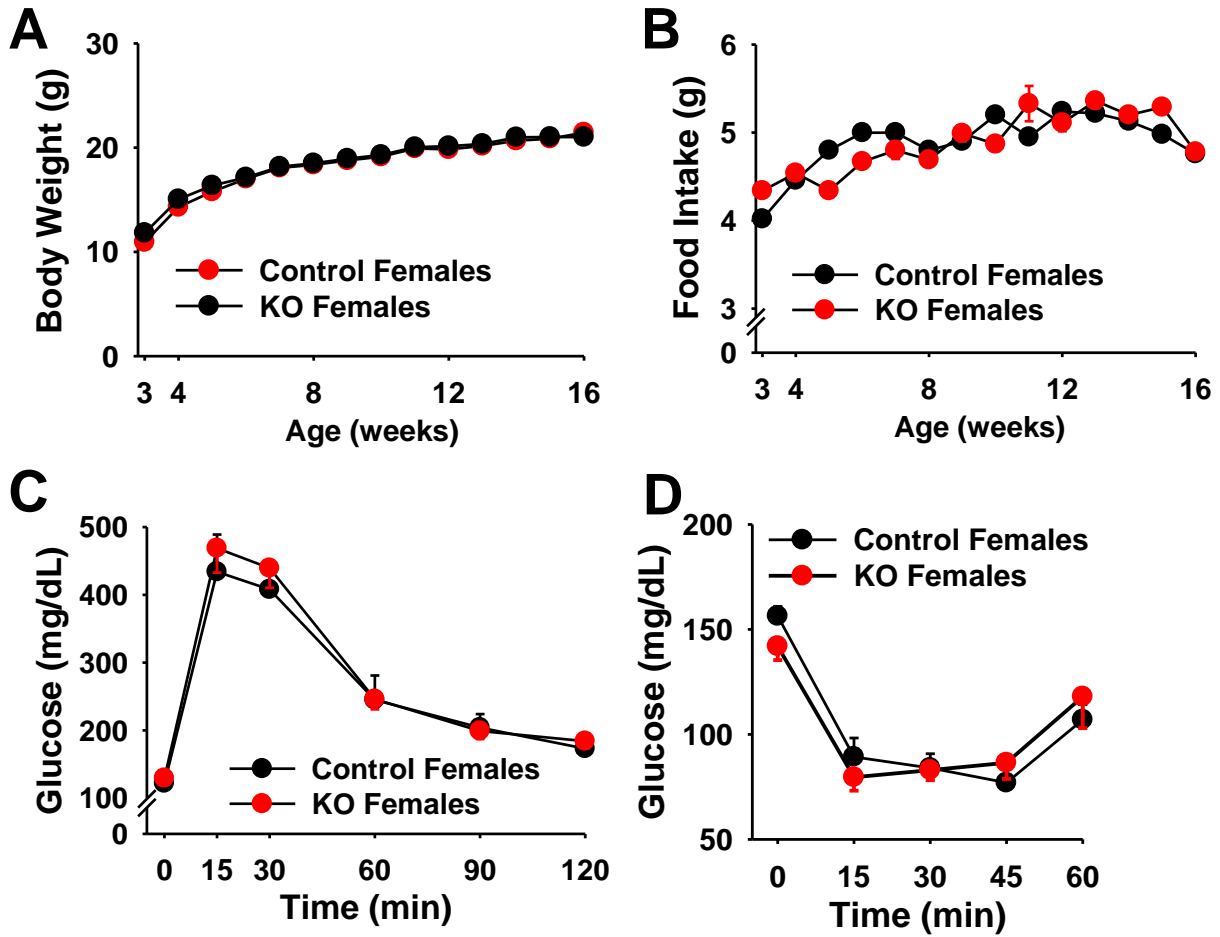

**Supplementary Figure 3.** *Metabolic phenotype of female mice lacking IGF-1R in AgRP neurons*

A-B: Body weight and food intake levels ( $n=11$  Controls,  $n=12$  KO) were not significantly different in female KO animals, as compared to controls. C-D: Similarly, no differences were seen between groups during glucose (GTT) or insulin (ITT) tolerance tests ( $n=8$  Controls,  $n=8$  KO). Data is represented as means  $\pm$ SE. There were no significant differences between groups.

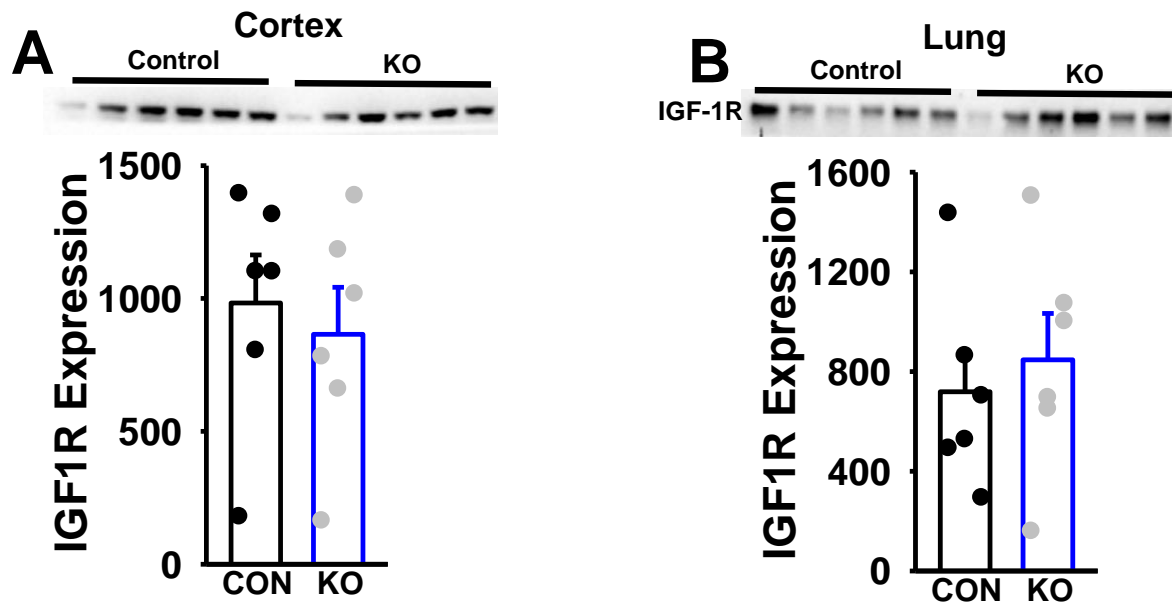

**Supplementary Figure 4.** *IGF-1R* expression levels in tissue sites outside of hypothalamus in control and knockout mice. IGF-1R levels were assessed via Western blot in (A) cortex and (B) lung tissue between Control (*Igf1r<sup>flox/flox</sup>*) and mice lacking IGF-1Rs in AgRP neurons (n=6 per group). No significant differences were observed in IGF-1R levels between groups at either of these sites.
